# Supplementary material for: Association Between Stress and Bilateral Symmetrical Alopecia in Free-Ranging Formosan Macaques (Macaca Cyclopis) in A High-Population-Density Area
Source: Research Square preprint supplement (doi:10.21203/rs.3.rs-294025/v1), 2021-03-17
Supplement: Supplementary file 2 [file 8840a6a4d835e1d855534909.docx]

Table S1. Characteristics of the four enzyme immunoassay systems adopted for detecting the fecal glucocorticoid metabolites and the coefficients of variation of intra- and interassay for each FGM EIA assay. The antibody, standard, and biotin-labeled steroid were provided by Palme R from the Department of Biomedical Sciences, University of Veterinary Medicine, Vienna, Austria

| EIAs | Cortisol1 | Corticosterone1 | 11-oxoetiocholanolone2 | 11𝛽-hydroxyetiocholanolone3 |
| --- | --- | --- | --- | --- |
| Immunogen | cortisol-3-CMO:BSA | corticosterone-3-CMO:BSA | 5𝛽-androstane-3𝛼-ol-11-17-dione | 5𝛽-androstane-3𝛼,11𝛽-diol-17-CMO:BSA |
| Label | cortisol-3-CMO-DADOO-biotin | cortisol-3-CMO-DADOO-biotin | 5𝛽-androstane-3𝛼-ol-11-17-CMO-biotinyl-3,6,9-trioxaundecanediamin | 5𝛽-androstane-3𝛼,11𝛽-diol-17-CMO-biotinyl-LC |
| Standard | cortisol | corticosterone | 5𝛽-androstane-3𝛼-ol-11-17-dione | 5𝛽-androstane-3𝛼,11𝛽-diol-17-one |
| Specificity | cortisol | corticosterone | 3𝛼,11oxo-CM | 3𝛼,11𝛽-dihydroxy-CM |
| Sensitivity (pg/well) | 2 | 2 | 2 | 2 |
| Intraassay CV4 | 9%, 5% (n = 33) | 9%, 10% | 10%, 4% | 7%, 5% |
| Interassay CV4 | 8%, 6% (n = 33) | 7%, 9% | 12%, 12% | 13%, 8% |

1EIA first described by Palme and Möstl (1997).

2 EIA first described by Möstl et al. (2002).

3 EIA first described by (Frigerio et al., 2004).

4 Values of intra- and interassay CV represent percentage variance for high and low concentrated quality controls.
